# Supplementary material for: Characterisation of lamina I anterolateral system neurons that express Cre in a Phox2a-Cre mouse line
Source: PubMed Central journal article supplement (PMC8429737; doi:10.1038/s41598-021-97105-w), 2021-09-09
Supplement: 41598_2021_97105_MOESM1_ESM.pdf [file 41598_2021_97105_MOESM1_ESM.pdf]

**Characterisation of lamina I anterolateral tract neurons that express Cre in a *Phox2a::Cre* mouse line**

Wafa A. A. Alsulaiman<sup>1\*</sup>, Raphaelle Quillet<sup>1\*</sup>, Andrew M. Bell<sup>1\*</sup>, Allen C. Dickie<sup>1</sup>, Erika Polgár<sup>1</sup>, Kieran A. Boyle<sup>1</sup>, Masahiko Watanabe<sup>2</sup>, R. Brian Roome<sup>3</sup>, Artur Kania<sup>3</sup>, Andrew J. Todd<sup>1</sup> and Maria Gutierrez-Mecinas<sup>1</sup>

<sup>1</sup>Institute of Neuroscience and Psychology, College of Medical, Veterinary and Life Sciences, University of Glasgow, Glasgow, G12 8QQ, UK; <sup>2</sup>Department of Anatomy, Hokkaido University School of Medicine, Sapporo 060-8638, Japan; <sup>3</sup>Institut de Recherches Cliniques de Montréal (IRCM), Montréal, QC H2W 1R7, Canada

Number of words in Abstract: 299

Main text: 4947

Online methods: 1887

Number of references: 62

Number of figures: 11

Correspondence:

Andrew Todd, Spinal Cord Group, Sir James Black Building, University of Glasgow,

Glasgow, G12 8QQ, UK. Email: [andrew.todd@glasgow.ac.uk](mailto:andrew.todd@glasgow.ac.uk)

or

Maria Gutierrez-Mecinas, Spinal Cord Group, Sir James Black Building, University of

Glasgow, Glasgow, G12 8QQ, UK. Email: [Maria.Gutierrez-Mecinas@glasgow.ac.uk](mailto:Maria.Gutierrez-Mecinas@glasgow.ac.uk)

\*These authors contributed equally

Fig S1

tdTom

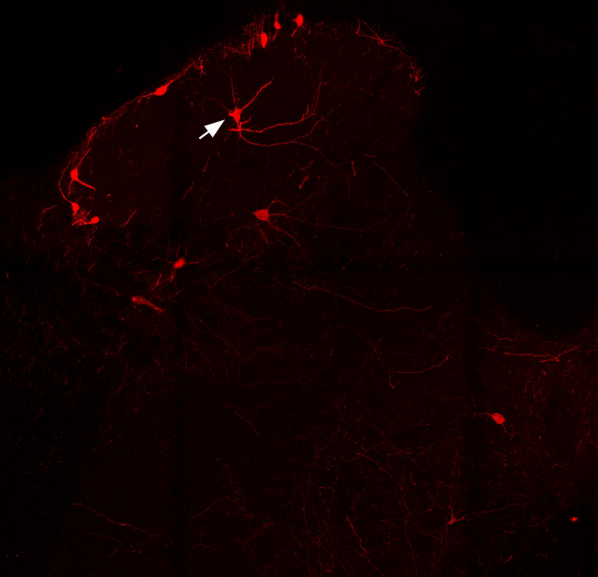

tdTom NeuN

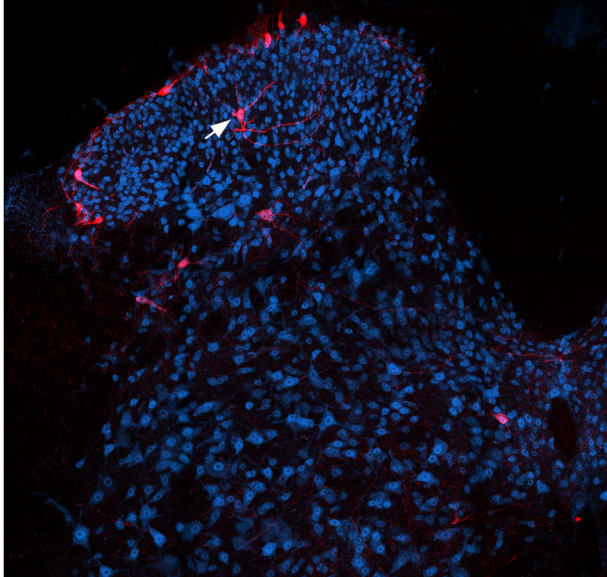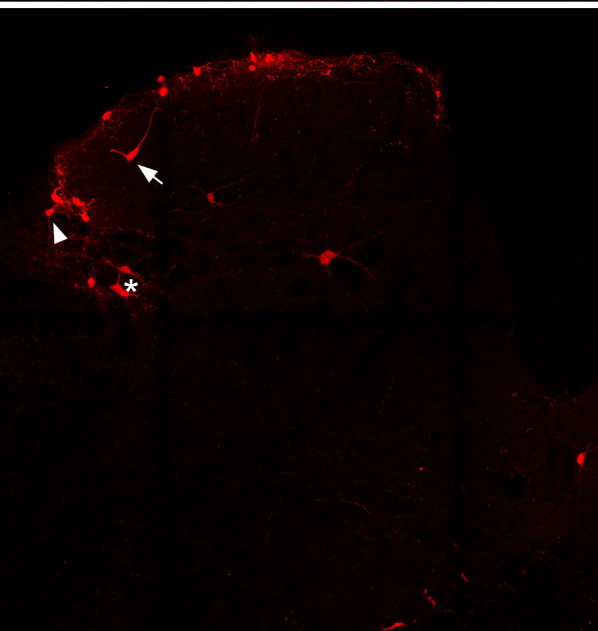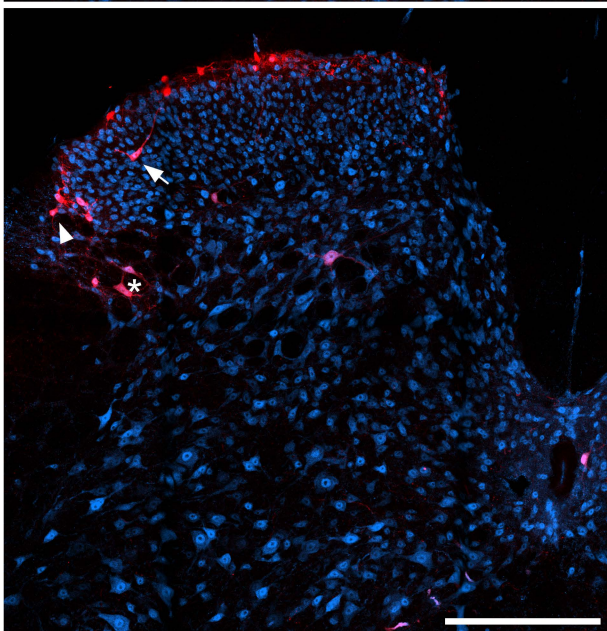

Fig S2

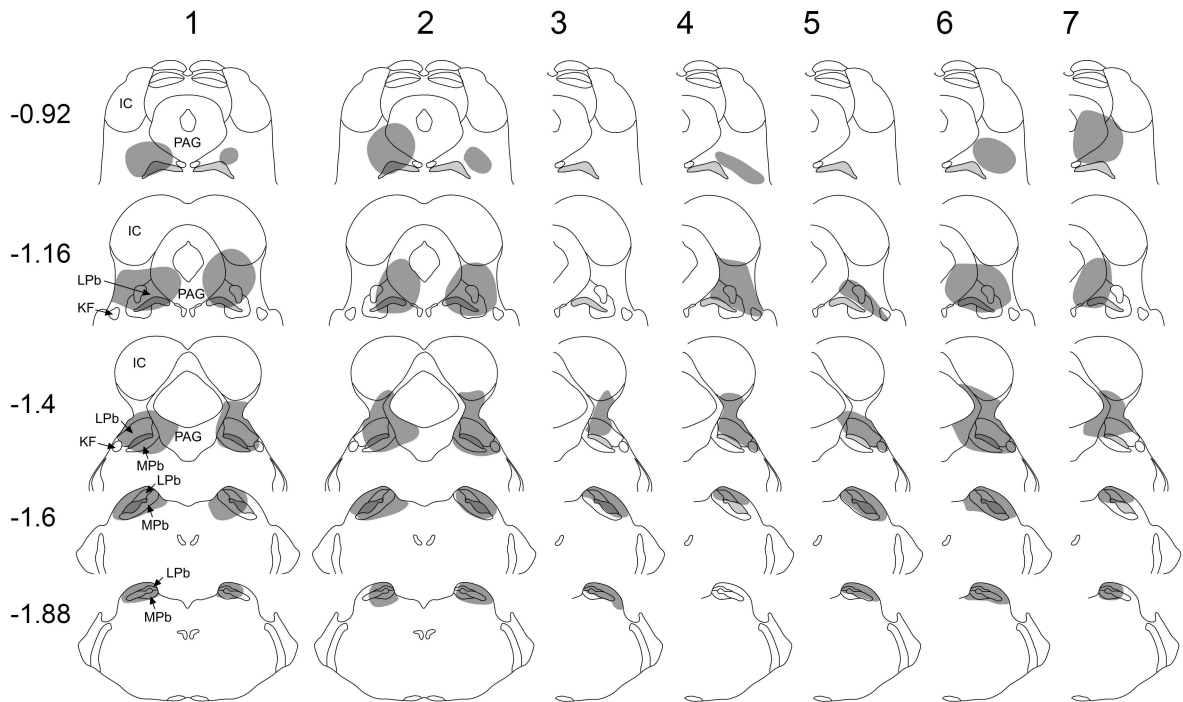

Fig S3

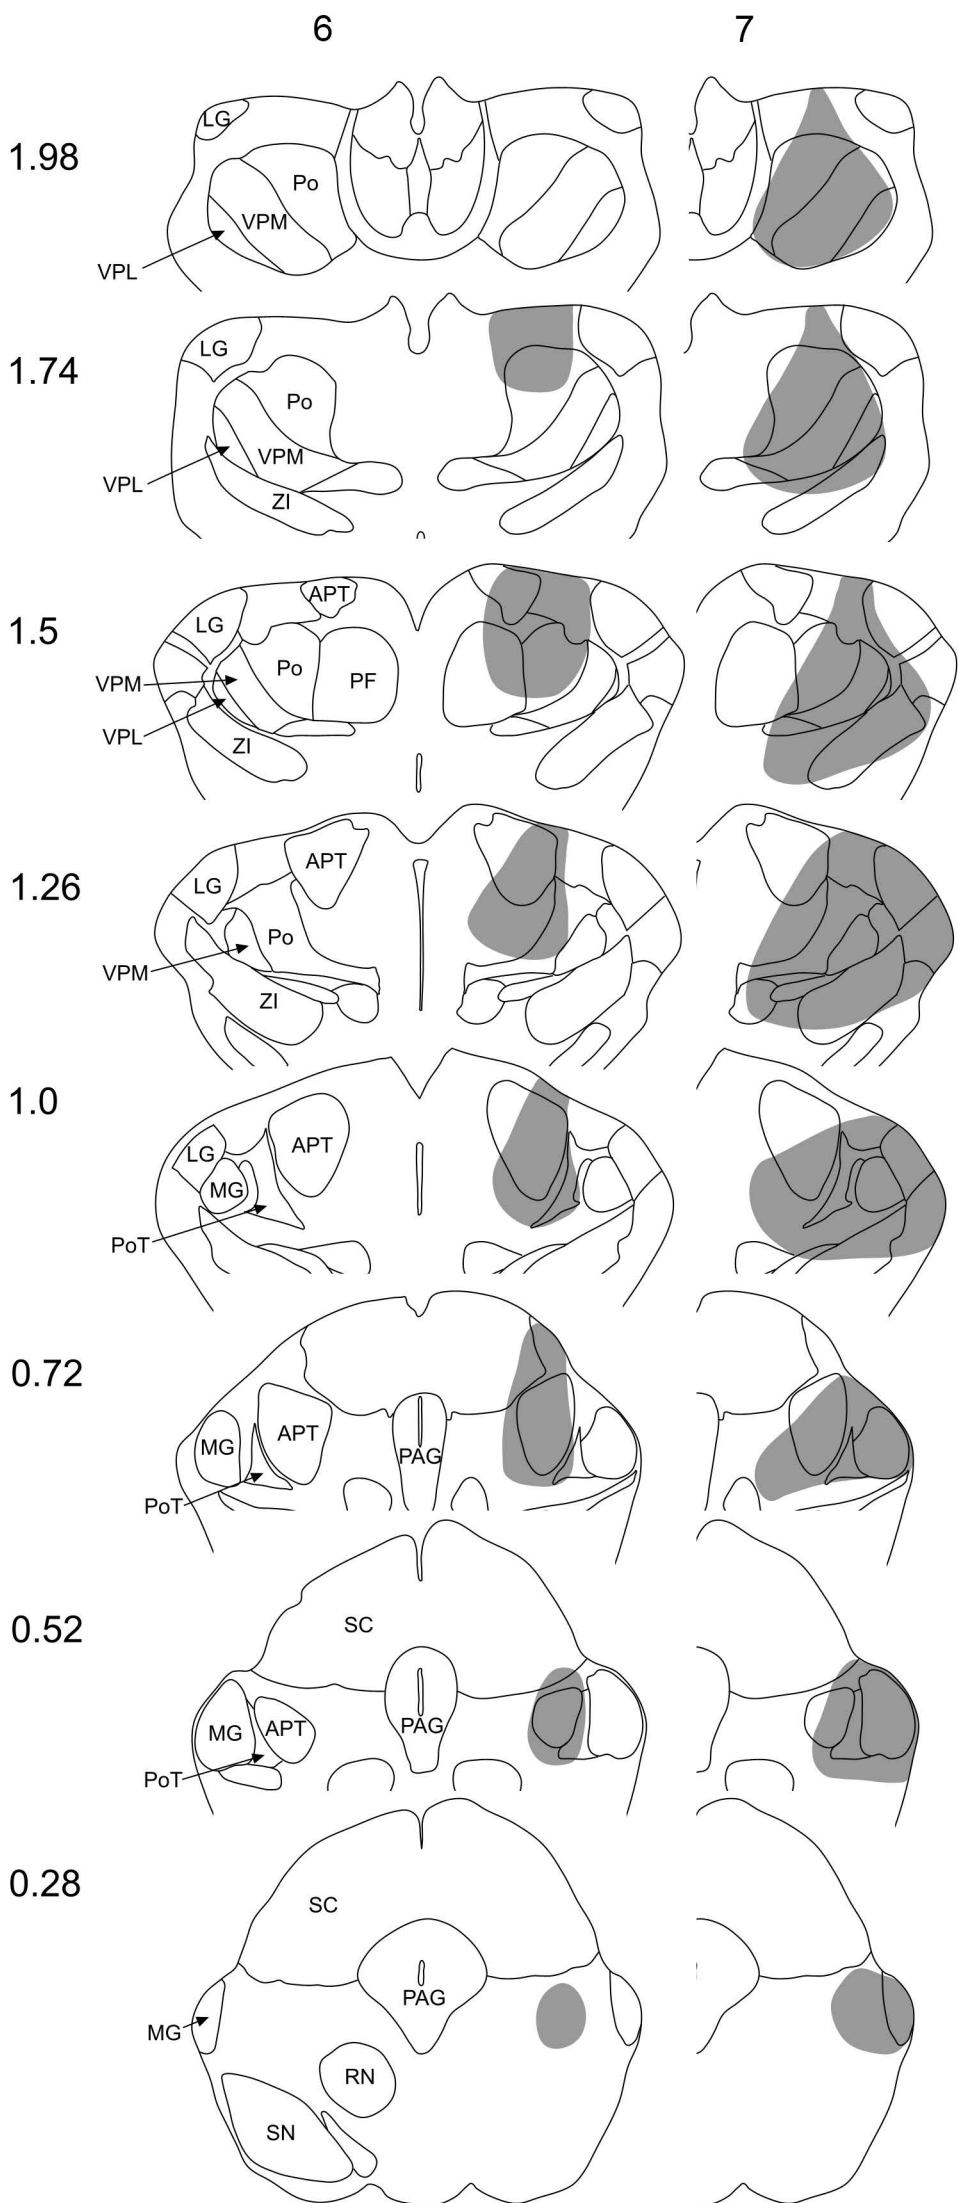

Fig S4

C7

L2

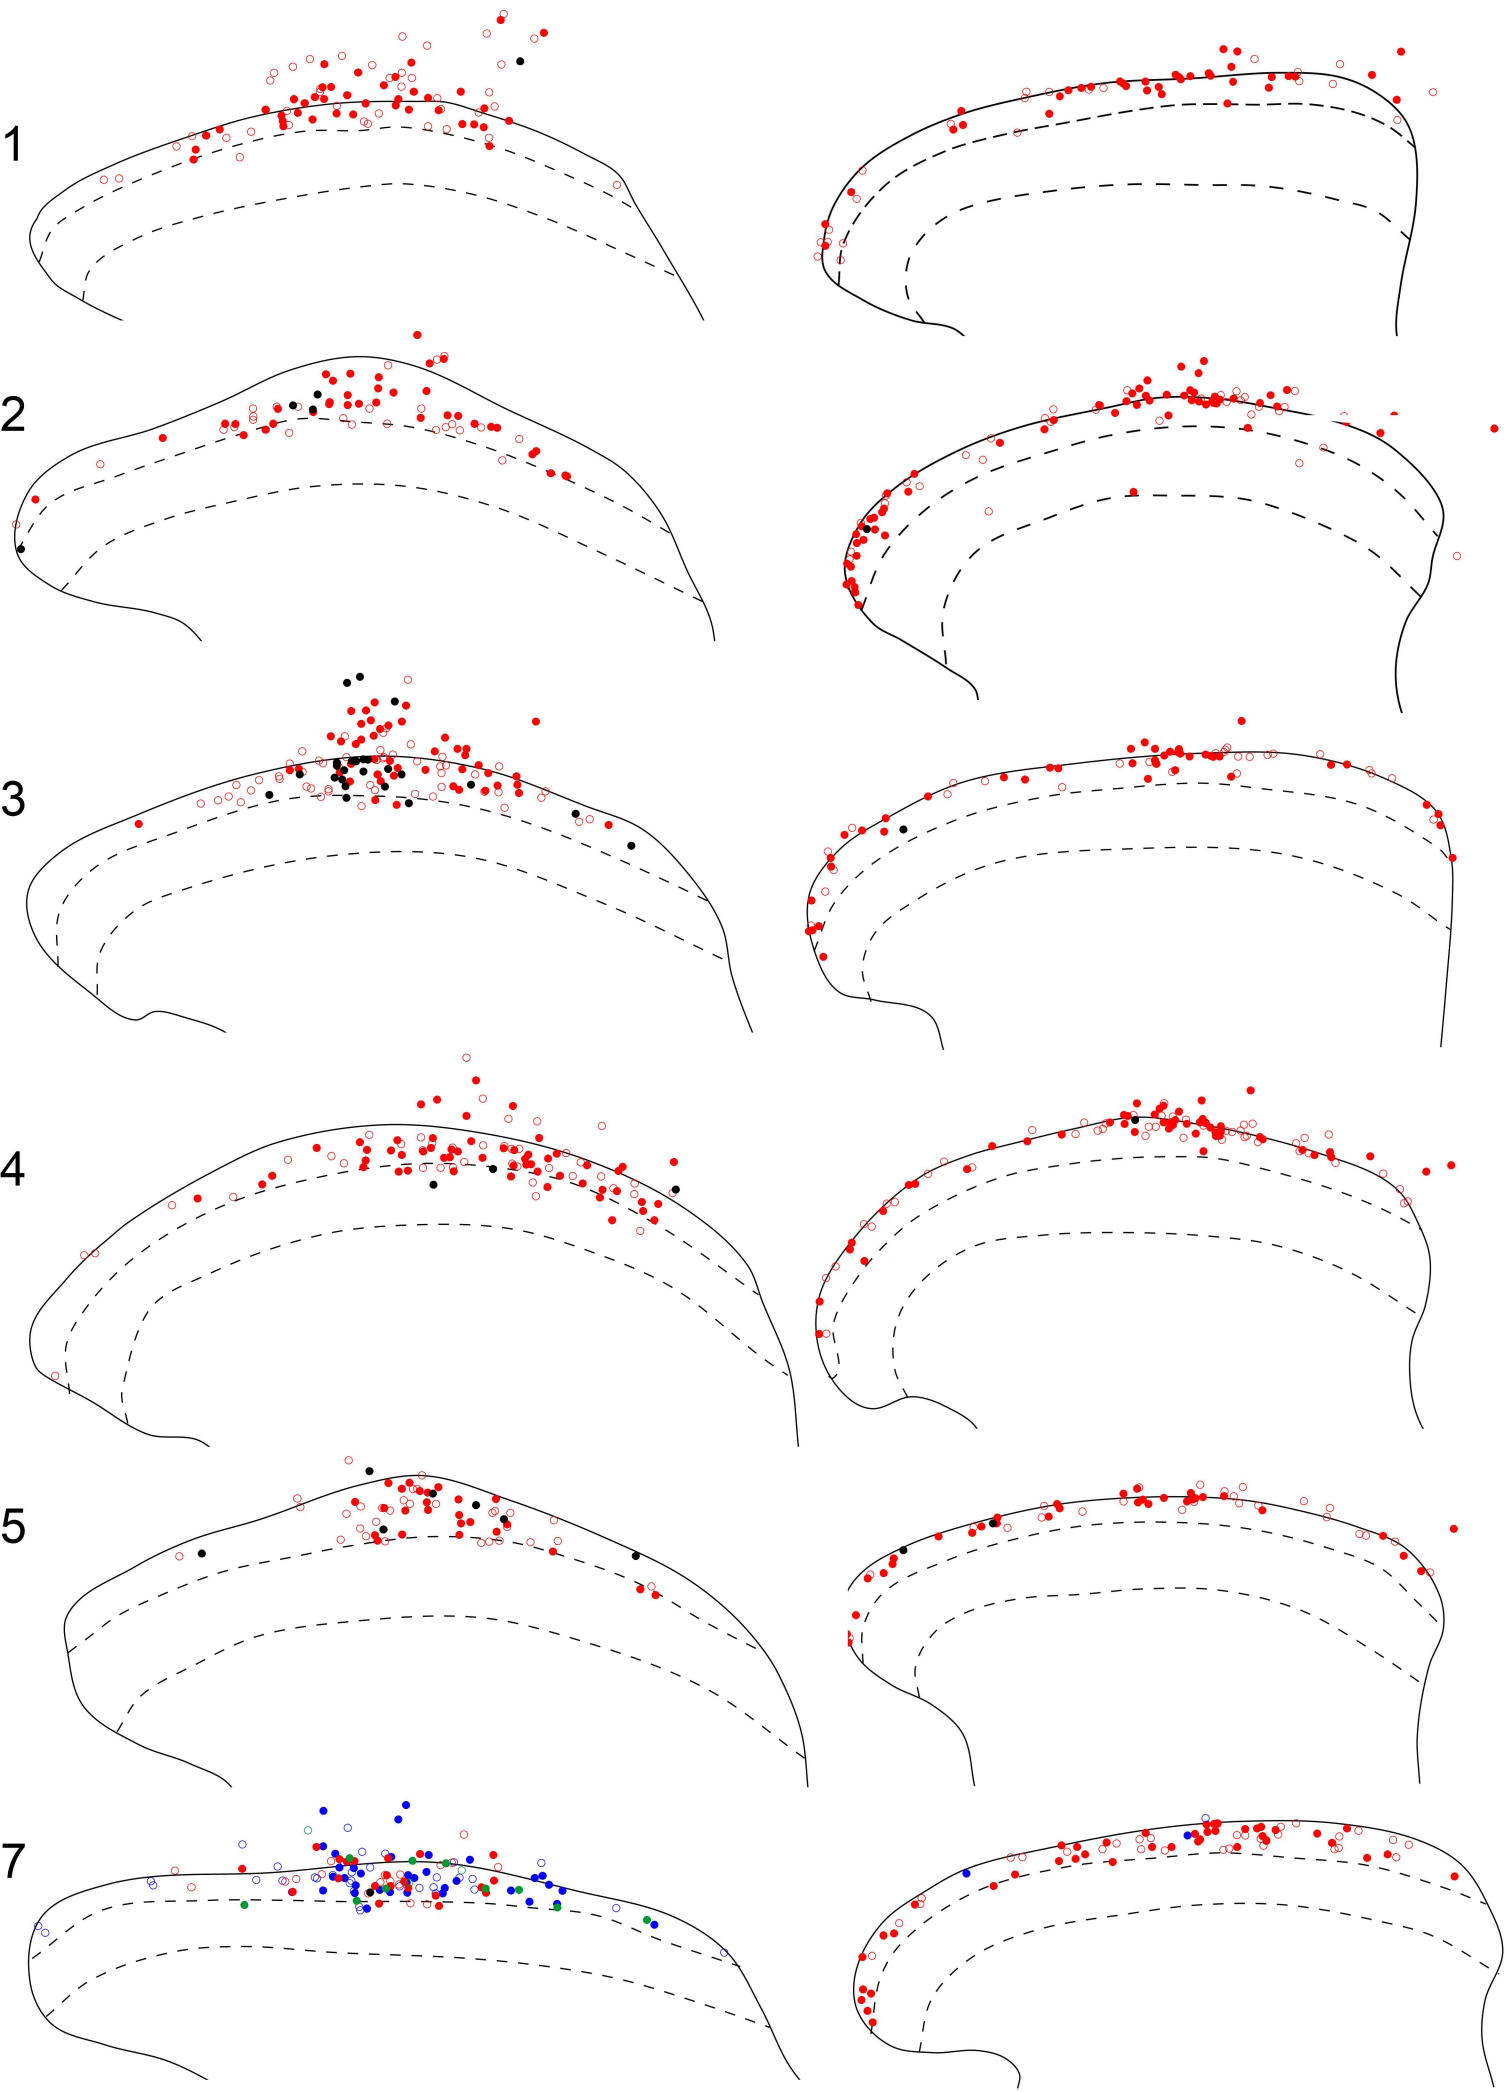

**Table S1** Antibodies used in this study

| <b>Antibody</b> | <b>Species</b> | <b>Dilution</b> | <b>Source</b>             | <b>Catalogue #</b> |
|-----------------|----------------|-----------------|---------------------------|--------------------|
| CTb             | Goat           | 1:5K            | List Biological           | 703                |
| Fluorogold      | Guinea Pig     | 1:500           | Protos Biotech Corp       | NM101              |
| mCherry†        | Chicken        | 1:5K            | Abcam                     | ab205402           |
| NeuN            | Mouse          | 1:500           | Millipore                 | MAB377             |
| NeuN            | Guinea Pig     | 1:500           | Synaptic systems          | 266004             |
| NK1r            | Rabbit         | 1:20K*          | Sigma-Aldrich             | S8305              |
| GFP             | Chicken        | 1:1K            | Abcam                     | ab13970            |
| Homer           | Goat           | 1:1K            | Nittobo Medical           | MSFR103230         |
| pERK            | Mouse          | 1:200           | Cell Signaling Technology | 9106               |

\* Used with the tyramide signal-amplification method

†This antibody recognizes TdTomato

**Table S2** RNAscope probes used in this study

| <b>Probe</b>                                                     | <b>Protein/peptide</b>                                                                                                 | <b>Channel numbers</b> | <b>Catalogue numbers</b> | <b>Z-pair number</b> | <b>Target region</b>                |
|------------------------------------------------------------------|------------------------------------------------------------------------------------------------------------------------|------------------------|--------------------------|----------------------|-------------------------------------|
| <i>tdTomato</i>                                                  | tdTom                                                                                                                  | 1,2                    | 317041                   | 20                   | 7 - 1382                            |
| <i>Tac1</i>                                                      | Substance P                                                                                                            | 3                      | 410351                   | 15                   | 20 - 1034                           |
| <i>Lypd1</i>                                                     | Lypd1                                                                                                                  | 1                      | 318361                   | 20                   | 2318 - 1306                         |
| <i>Tac1r</i>                                                     | NK1r                                                                                                                   | 2                      | 428781                   | 20                   | 845 - 1775                          |
| <i>Gpr83</i>                                                     | Gpr83                                                                                                                  | 3                      | 317431                   | 20                   | 545 - 1578                          |
| RNAscope multiplex positive control ( <i>Polr2a, Ppib, Ubc</i> ) | Polr2a: DNA-directed RNA polymerase II subunit RPB1; Ppib: Peptidyl-prolyl cis-trans isomerase B; Ubc: Polyubiquitin-C | 1,2,3                  | 320881                   | 20<br>15<br>n/a      | 2802 – 3678<br>98 – 856<br>34 - 860 |
| RNAscope multiplex negative control ( <i>dapB</i> )              | dapB: 4-hydroxy-tetrahydrodipicolinate reductase (derived from B Subtilis)                                             | 1,2,3                  | 320871                   | 10                   | 414 - 862                           |

## Supplementary figure legends

Fig S1 Distribution of tdTomato cells in the L2 segment in two *Phox2a::Cre;Rosa26<sup>LSL</sup>-tdTomato* mice. The sections have been stained to reveal tdTom (red) and NeuN (blue). In each case there are several tdTom-positive cells in lamina I, and scattered cells elsewhere in the grey matter. Cells in lamina III with long dorsal dendrites (“antenna cells”) are indicated with arrows. There is a cluster of cells in the lateral, reticulated part of lamina V (asterisk), and occasional cells are seen in the lateral spinal nucleus (one indicated with an arrowhead). The images are projected from confocal scans (1  $\mu\text{m}$  z-separation) through the full thickness of the section. Scale bar = 200  $\mu\text{m}$ .

Fig S2 Diagrams to show the spread of CTb (dark shaded area) from the injection sites that were targeted on the lateral parabrachial area. Each vertical column represents a single experiment and the experiment number (corresponding to those in Tables 1-3) is shown at the top of the column. Numbers to the left show the approximate position of the section posterior to the ear-bar. Drawings are based on those in Franklin & Paxinos<sup>62</sup>. IC, inferior colliculus; KF, Kolliker-Fuse nucleus; LPb, lateral parabrachial area; MPb, medial parabrachial area; PAG, periaqueductal grey matter. The superior cerebellar peduncle is shown with light shading. Outline drawings were prepared with XaraXtreme v2 (<http://www.xaraxtreme.org/>).

Fig S3 Diagrams to show the spread of Fluorogold (shaded area) from the injection sites targeted on the thalamus. Each column represents a single experiment, with the number (corresponding to those in Tables 1-3) shown at the top. Numbers to the left show the approximate position of the section anterior to the ear-bar. Drawings are based on those in Franklin & Paxinos<sup>62</sup>. APT, anterior pretectal area; LG, lateral geniculate nucleus; MG, medial geniculate nucleus; PAG, periaqueductal grey matter;



PF, parafascicular nucleus; PoT, posterior triangular nucleus of the thalamus; RN, red nucleus; SC, superior colliculus; SN, substantia nigra; VPL, ventral posterolateral nucleus of thalamus; VPM, ventral posteromedial nucleus of thalamus; ZI, zona incerta. Outline drawings were prepared with XaraXtreme v2 (<http://www.xaraxtreme.org/>).

Fig S4 Plots showing the distribution of retrogradely-labelled and tdTomato-positive cells in the C7 and L2 segments from experiments #1-5 and #7. For experiments #1-5 cholera toxin B subunit (CTb) injections were targeted on the lateral parabrachial area. Red symbols show retrogradely labelled cells that were Phox2a-positive (filled) or Phox2a-negative (open). Phox2a cells that were not labelled with CTb are shown as solid black circles. In experiment #7 injections of CTb and Fluorogold were targeted on the lateral parabrachial area and thalamus, respectively. In this case tdTomato-positive and -negative cells are shown with solid and open symbols, respectively. Those that were retrogradely labelled with CTb and FG are shown in blue, and those labelled only with CTb in red and those labelled only with FG are green. tdTomato cells that were not retrogradely labelled are shown in black. Dashed lines represent the dorsal and ventral borders of lamina II. Outline drawings were prepared with XaraXtreme v2 (<http://www.xaraxtreme.org/>).
